# Supplementary material for: LPA disruption with AAV-CRISPR potently lowers plasma apo(a) in transgenic mouse model: A proof-of-concept study
Source: PubMed Central journal article supplement — Mol Ther Methods Clin Dev. 2022 Oct 13;27:337–51. doi: 10.1016/j.omtm.2022.10.009 (PMC9630778; doi:10.1016/j.omtm.2022.10.009), 2022-10-13
Supplement: mmc1.pdf [file mmc1.pdf]

**Supplemental information**

***LPA* disruption with AAV-CRISPR**

**potently lowers plasma apo(a) in transgenic**

**mouse model: A proof-of-concept study**

**Alexandria M. Doerfler, So Hyun Park, Julia M. Assini, Amer Youssef, Lavanya Saxena, Adam B. Yaseen, Marco De Giorgi, Marcel Chuecos, Ayrea E. Hurley, Ang Li, Santica M. Marcovina, Gang Bao, Michael B. Boffa, Marlys L. Koschinsky, and William R. Lagor**

## Supplemental Information

### Supplemental Figures and Legends

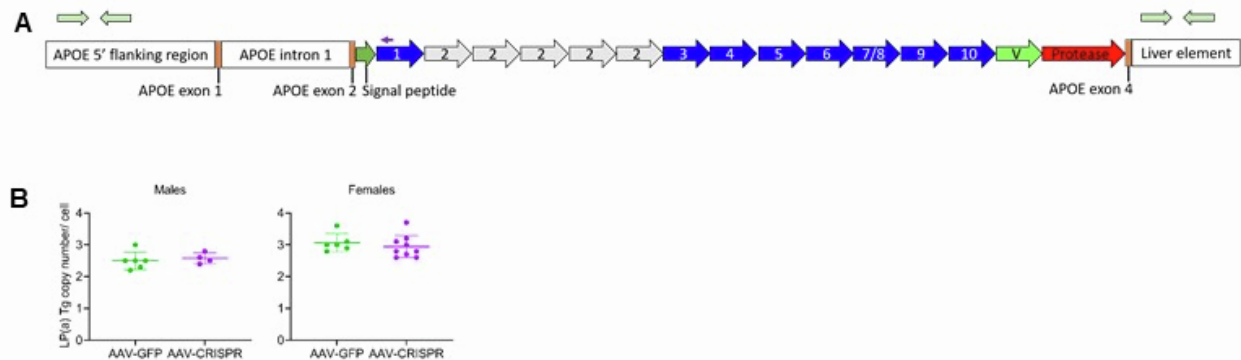

**Figure S1. *LPA* transgene construct copy number analysis in  $LPA^{+/0} Ldlr^{-/-}$  (See also Figure 1).** A. Schematic of the *LPA* transgene construct and primers used for copy number analysis (indicated by green arrows, primer binding sites are not drawn to scale but indicate which elements on the construct they bind). B. ddPCR results showing an average of 3 *LPA* transgene copies/diploid genome (c/dg) in male and female  $LPA^{+/0} Ldlr^{-/-}$  mice treated with AAV-GFP or AAV-CRISPR. Statistical analysis was done using Welch's t-test with  $*p < 0.05$ . Values are mean  $\pm$  SD



construct. D. Schematics of the integrated *LPA* transgene. *LPA*<sup>+0</sup> *Ldlr*<sup>-/-</sup> mice have three tandem repeats of the *LPA* construct in direct orientations integrated at chr3:120164677.

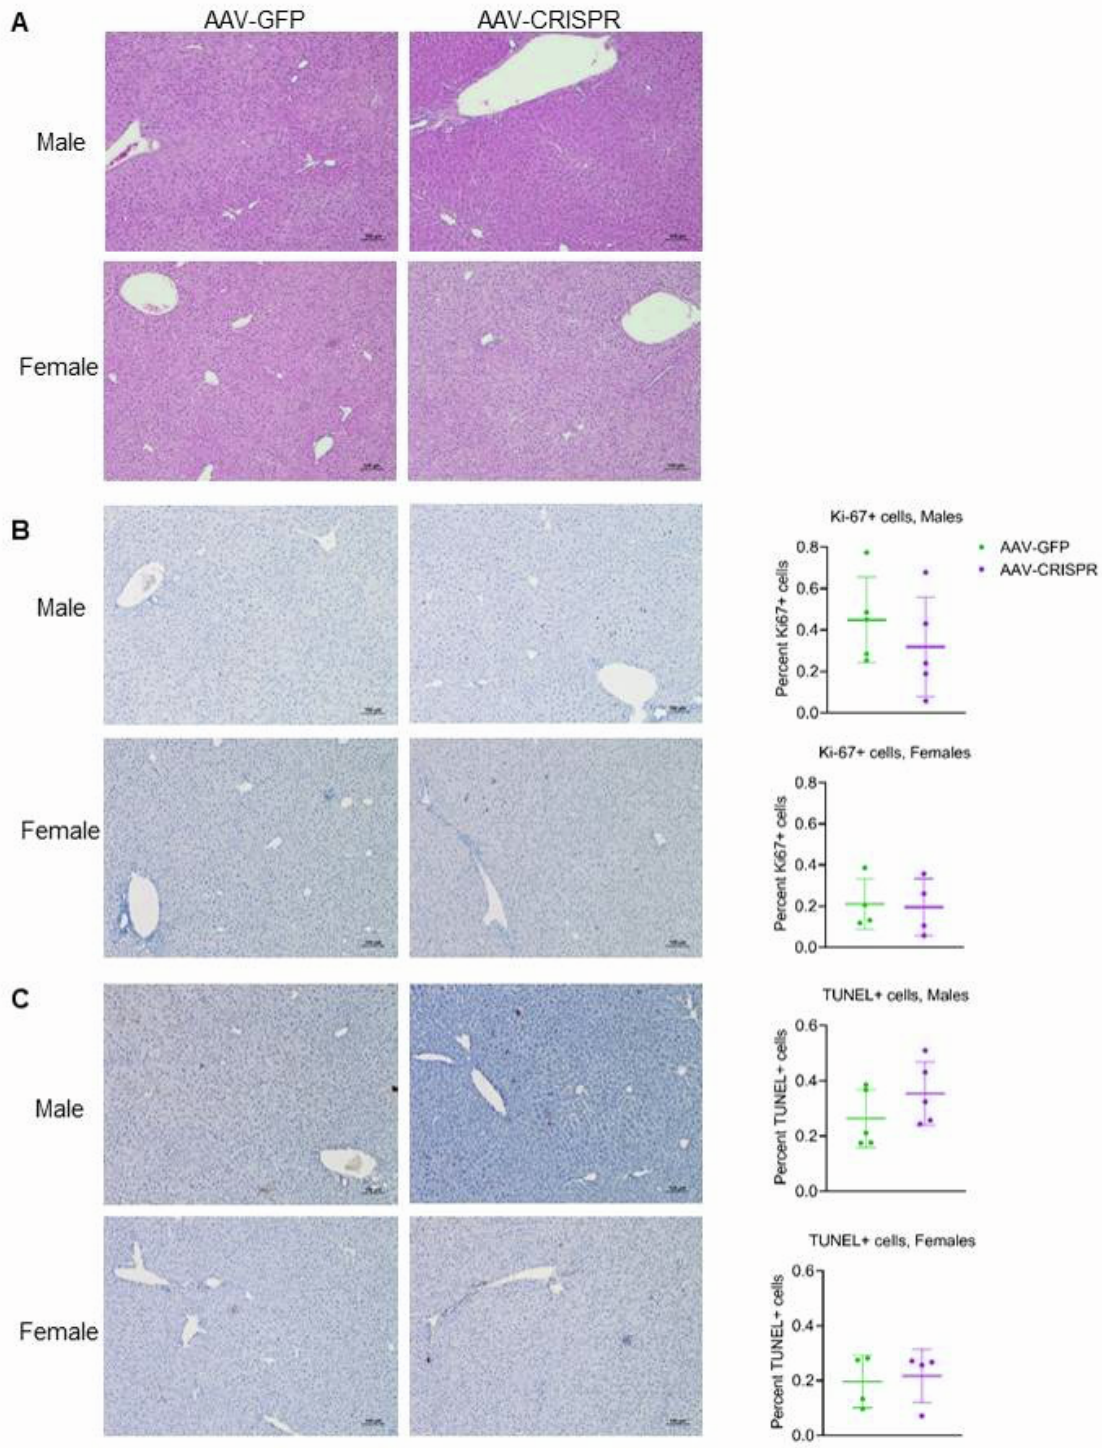

**Figure S3. Histology analysis on AAV-GFP and AAV-CRISPR treated mice (See also Figure 2).** A. Representative images for hematoxylin and eosin stained male and female mouse livers injected with either AAV-GFP or AAV-CRISPR. B. Representative images and

quantification of Ki67 stained male and female mouse livers. C. Representative images and quantification of TUNEL stained male and female mouse livers. Statistical analysis was done using Mann-Whitney test on non-normally distributed data with  $*p < 0.05$  (TUNEL+cells females). Statistical analysis was done using a Welch's  $t$ -test on normally distributed data with  $*p < 0.05$ . (Ki67+ cells males and females, and TUNEL+ cells males). Values are mean  $\pm$  SD.

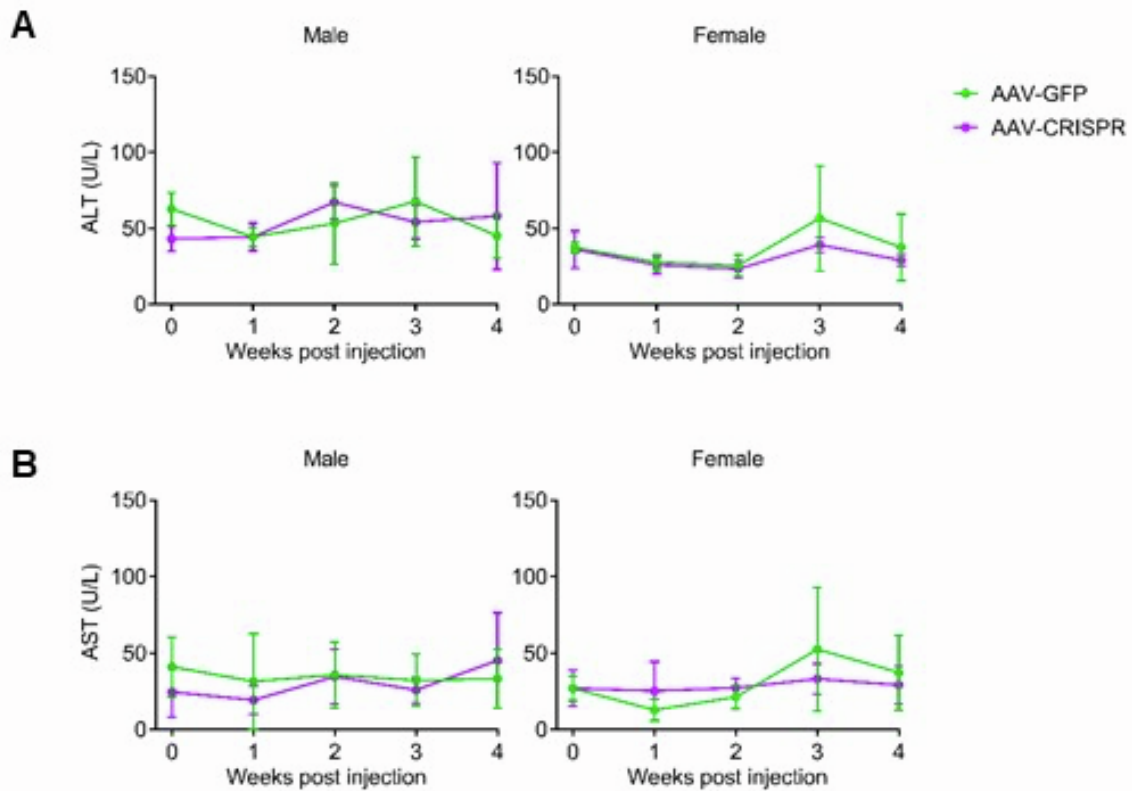

**Figure S4. ALT and AST analyses (See also Figure 2).** A. ALT analysis on plasma from mice treated with AAV-GFP or AAV-CRISPR. B. AST analysis on plasma from mice treated with AAV-GFP or AAV-CRISPR. Statistical analysis was done using a Welch's *t*-test at each time point with \**p*<0.05. Values are mean  $\pm$  SD.

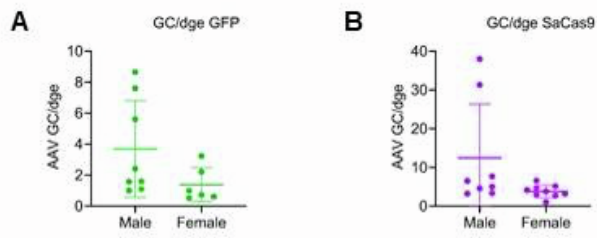

**Figure S5. AAV vector genome copies per diploid genome analysis (See also Figure 2).**

qPCR for vector genomes in mice that received either A. GFP copy number in AAV-GFP treated mice or B. SaCas9 copy number in AAV-CRISPR treated mice. Statistical analysis was done using Mann-Whitney test with  $*p < 0.05$ . Values are mean  $\pm$  SD.



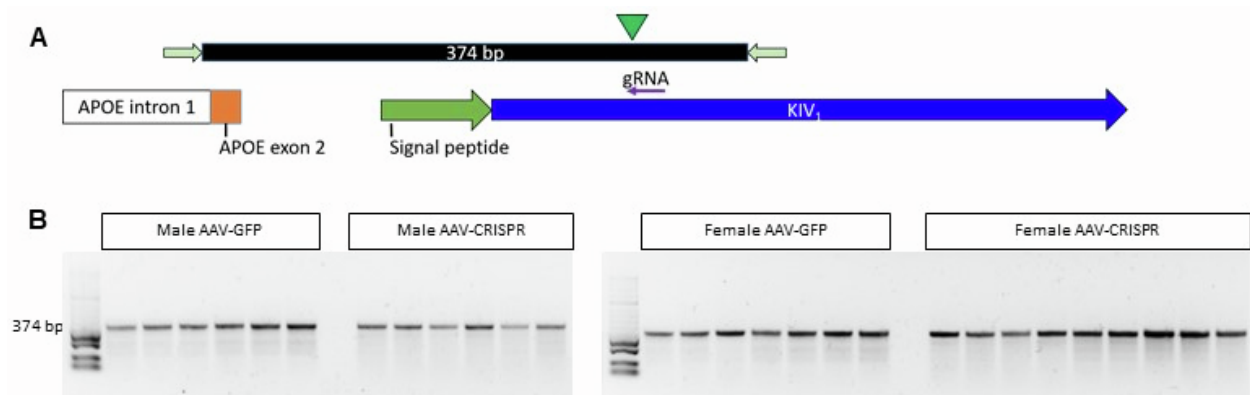

**Figure S6. On-target insertion and deletion analysis of  $LPA^{+/-} Ldlr^{-/-}$  mouse livers injected with AAV-CRISPR (See also Figure 3).** A. Schematics of KIV<sub>1</sub> specific primer design used for T7E1 and ICE analysis (indicated by green arrows, ICE analysis not shown). The on-target site is indicated by the green triangle. The purple arrow shows the 5' to 3' of gRNA specific for the KIV<sub>1</sub>. B. No measurable cleavage activity was detected by T7E1 analysis.

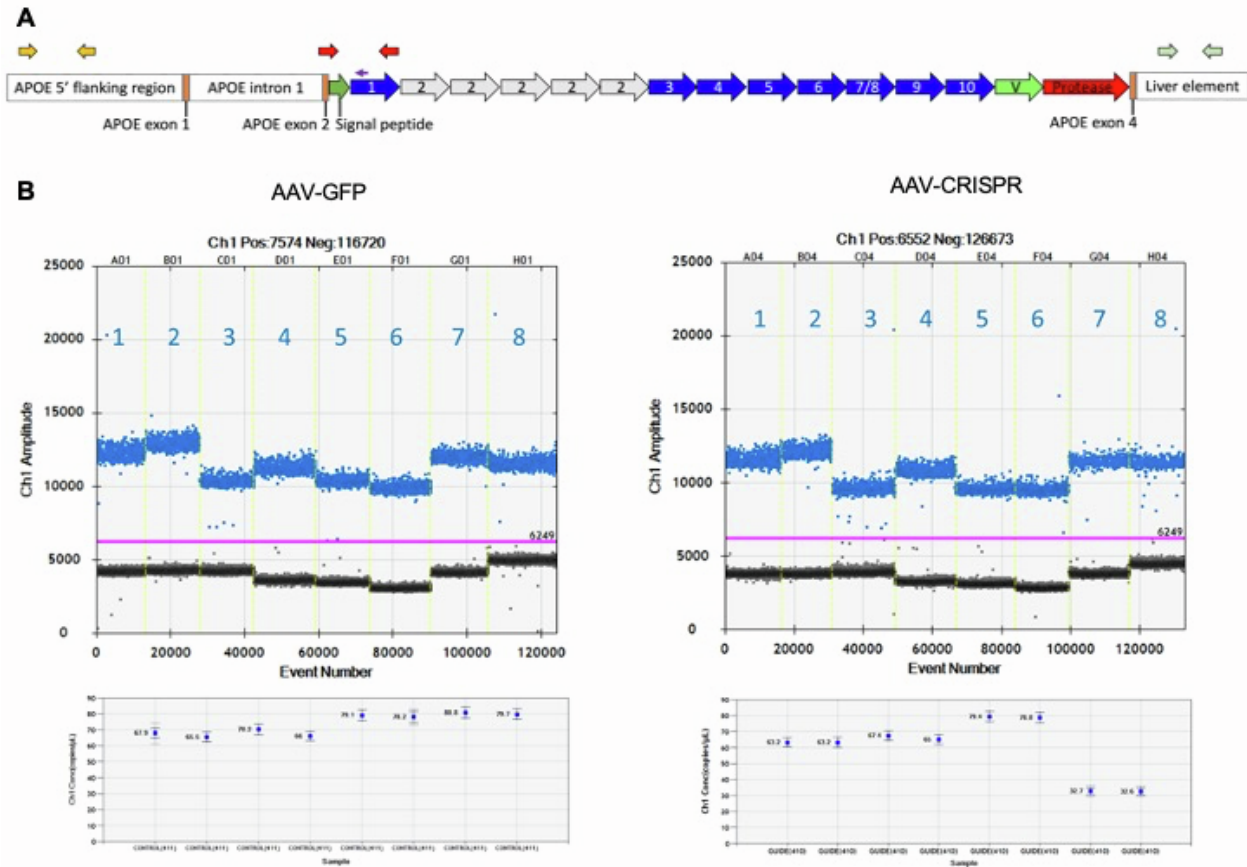

**Figure S7. Representative Evagreen-based ddPCR copy number assay amplitude droplet separation and copy number quantification (See also Figure 3). A.** Schematics of a KIV<sub>1</sub> specific primer pair used to quantify the frequency of un-rearranged on-target site on KIV<sub>1</sub> by ddPCR (indicated by red arrows). Yellow and green arrows indicate primer pairs used for copy number analysis at the APOE 5' flanking region or the liver element in the apo(a) transgene, respectively. (Primer binding sites are not drawn to scale but indicate which elements on the construct they bind). The purple arrow shows the 5' to 3' of gRNA specific for the KIV<sub>1</sub>. The *TFRC* and *RPP30* genes were used as genomic reference sites for the ddPCR but primer binding sites are not shown. **B.** Representative ddPCR results for AAV- GFP and AAV-CRISPR treated mice. Lane 1: *TFRC* primer set 1, 2: *TFRC* primer set 2, 3: *RPP30* primer set 1, 4:

*RPP30* primer set 2, 5: APOE 5' end of *LPA* construct, 6: Liver element 3' end of *LPA* construct,  
7: *LPA* on-target in KIV<sub>1</sub> primer set 1 and 8: *LPA* on-target in KIV<sub>1</sub> primer set 2.

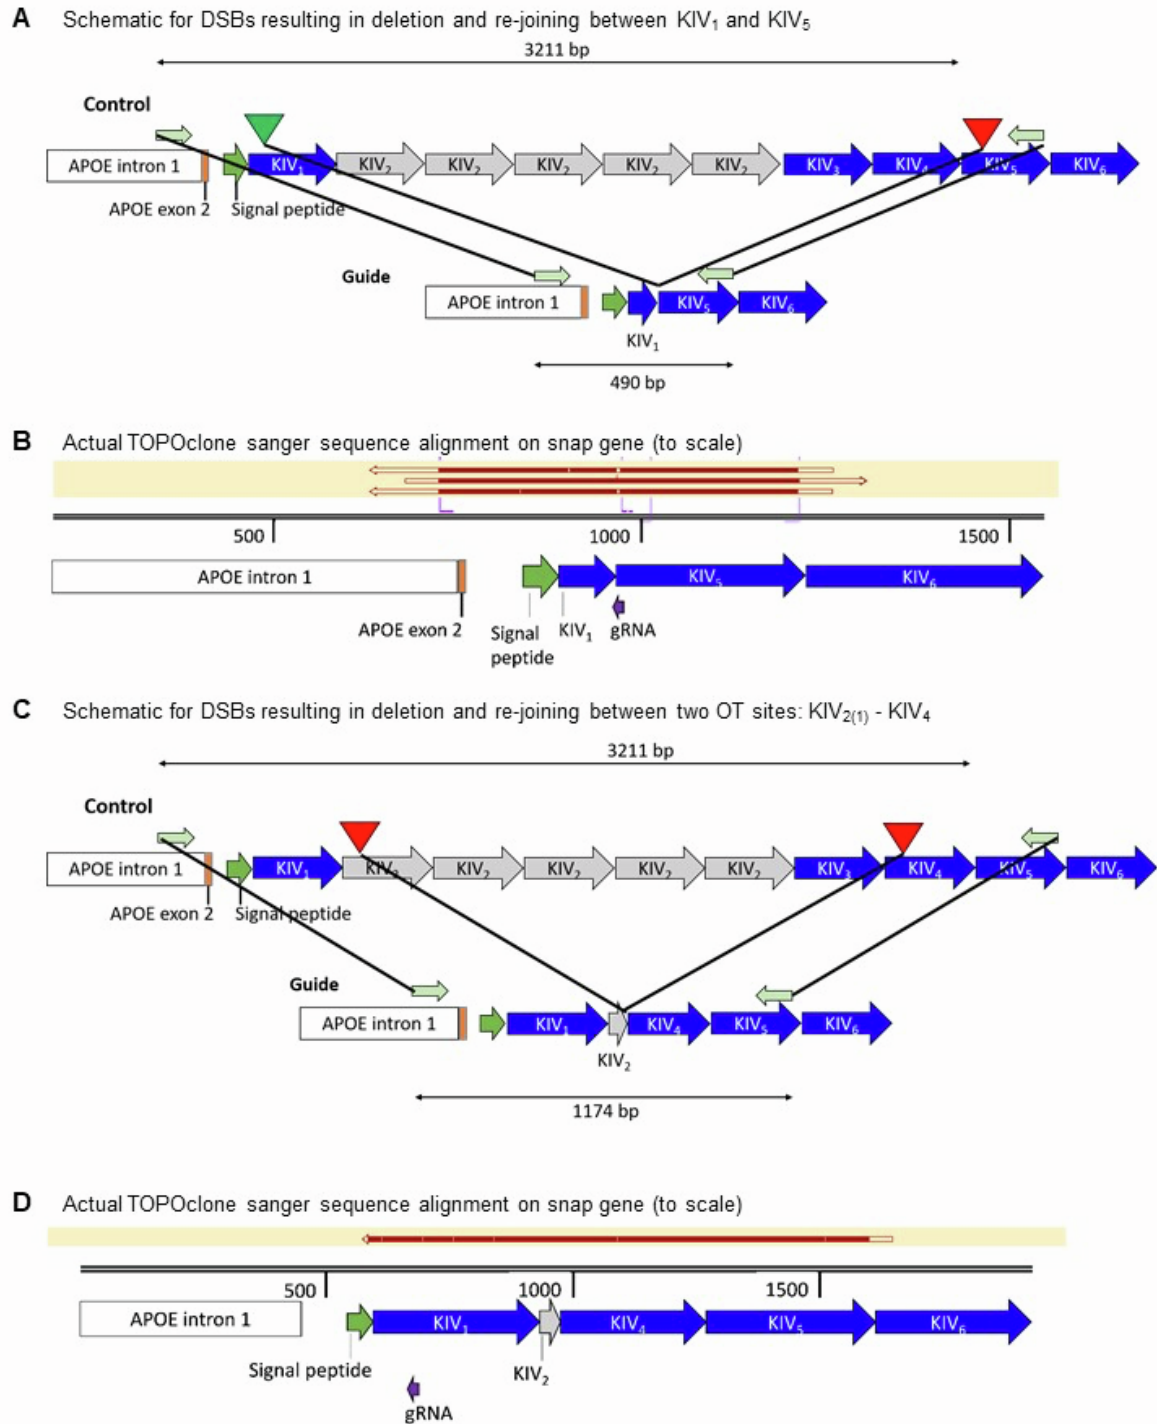

**Figure S8. Schematics and aligned TOPO clone sequences for validation of CAST-seq identified large deletion between KIV<sub>1</sub> and KIV<sub>5</sub> (See also Figure 3).** A. Schematic for TOPO clone sequencing of truncated amplicons from AAV-CRISPR treated mice showing the product

of 2.7kb large deletion created by DSBs re-joining or chromosomal rearrangements between KIV<sub>1</sub> and KIV<sub>5</sub> DSBs. B. TOPO clone sanger sequence alignment on SnapGene. C. Schematic for topo clone sequencing of truncated amplicons from AAV-CRISPR treated mice showing the product of 2kb large deletion created by DSBs re-joining or chromosomal rearrangements between two OT DSBs: KIV<sub>2(1)</sub> and KIV<sub>4</sub>. D. TOPO clone sanger sequence alignment on SnapGene. On-target cut sites are indicated by green inverted triangles and OT cut sites are indicated by red inverted triangles. Specific primer pair design is indicated by light green arrows.

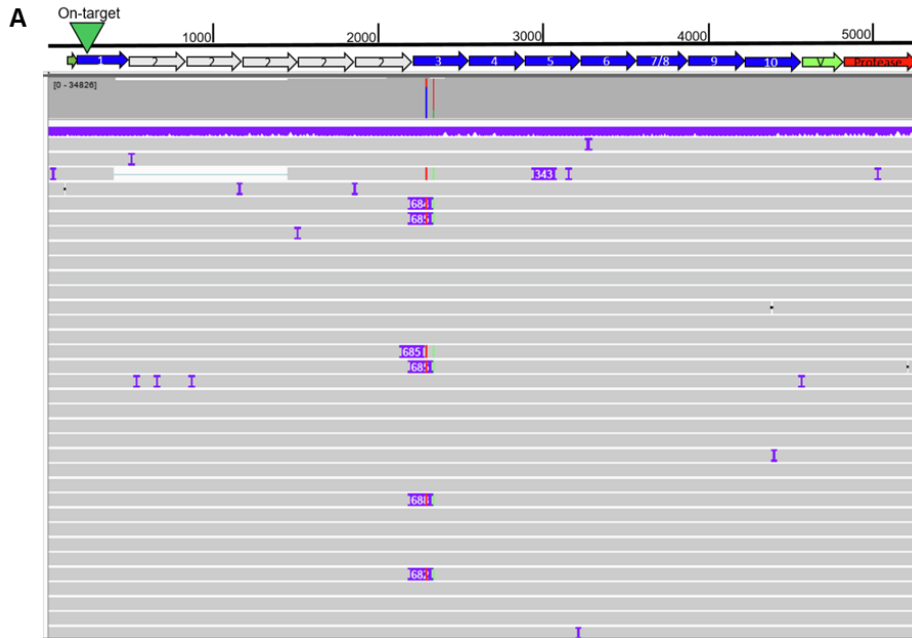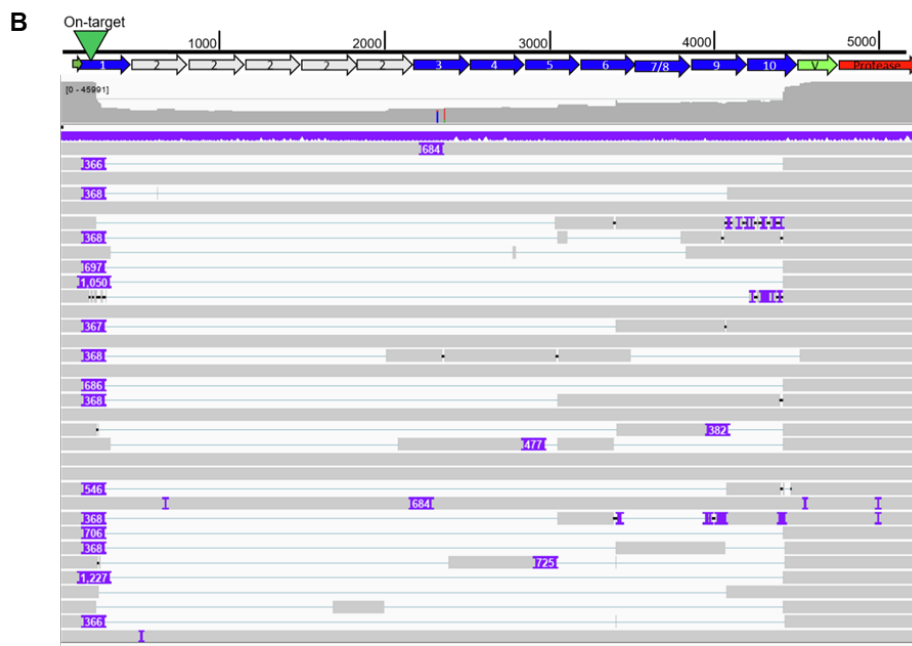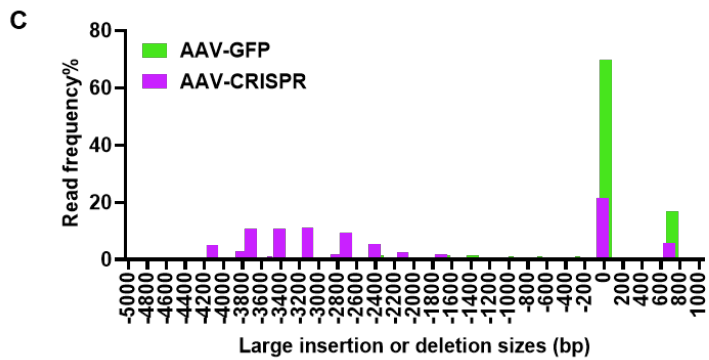

**Figure S9. PacBio SMRT sequencing analysis (See also Figure 3).** PacBio SMRT sequencing generated HiFi reads alignment as viewed on IGV with either A. AAV-GFP or B.AAV-CRISPR treated samples. A. In AAV-GFP sample, 70% of reads were the expected full-length 13K cDNA, while 17% of reads had an unexpected longer 15K sequence with a 684 bp insertion at KIV<sub>3</sub> (**See Figure S10**). The remaining 12% of reads in the control sample were diverse homologous deletions of up to eight KIV domains most likely due to PCR artifacts. B. In AAV-CRISPR sample, 22% of reads had expected 13K cDNA sequences, while 6% of reads had 15K cDNA, and 72% of reads had deletions ranging from 1710 bp to 4079 bp. In contrast to the homologous deletions observed in AAV-GFP, deletions in the AAV-CRISPR sample are the products of CRISPR DSBs at ON and OT sites. We also observed alleles containing multiple deletions at ON-OT and between OTs. C. Histogram showing the frequency of reads corresponding to 13K, 15K, and deletions in AAV-GFP or AAV-CRISPR treated samples. Note that the read frequency does not represent the allele frequency due to template length bias during PCR amplification, but nonetheless provides information on a relative abundance and full-length sequences of LPA transgene alleles.

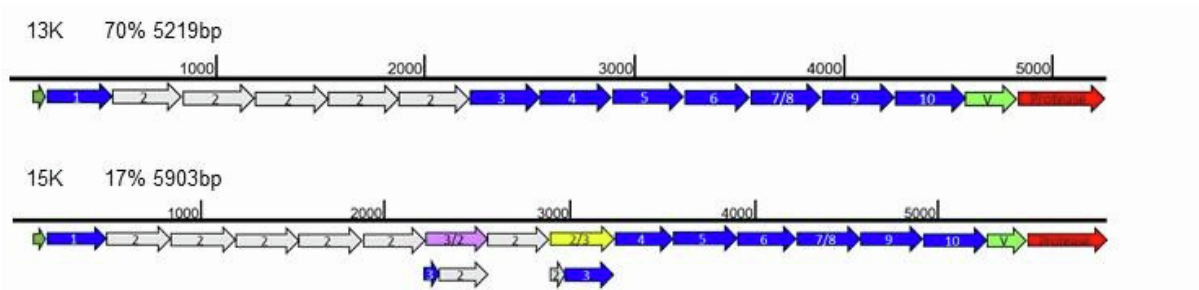

**Figure S10. Schematic for transgene construct sequences for 13K or 15K (See also Figure 3).** The longer 15K reads in the control sample contained a  $KIV_{3/2}$  hybrid,  $KIV_{2(6)}$ , and  $KIV_{2/3}$  hybrid contiguous sequence which could have resulted from homologous recombination in the germline of founder mice.<sup>29</sup> Another explanation for these unusual reads is a PCR artifact since amplification of highly similar sequences can produce undesired products such as recombination or chimera formation.<sup>30</sup> This remains to be validated using amplification-free long-read sequencing of the integrated LPA transgene.<sup>1</sup>



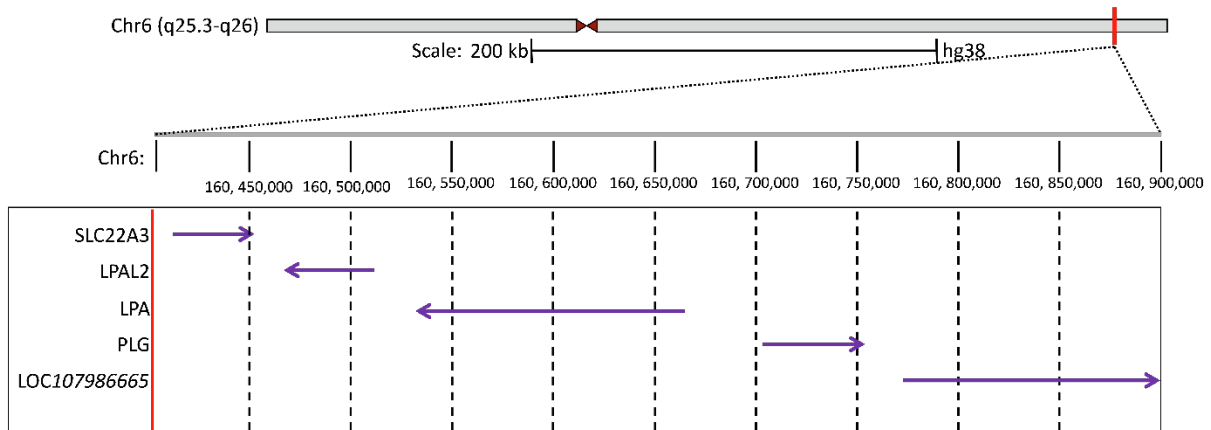

**Figure S11. Schematic for the location of pseudogenes nearby *LPA* (See also Figure 4).**

Two of the GUIDE-seq identified off-target sites are located in *LPAL2* and *LOC107986665* pseudogenes, 173 kbp and 256 kbp away from *LPA* on-target, respectively. *PLG* is located between *LPA* and *LOC107986665*.

## Supplemental Tables and Legends

**Table S1. Off-target (OT) sites identified by GUIDE-seq in plasmid treated HEK293T (See also Figure 4).** GUIDE-seq identified 25 off-target sites which were labeled according to the descending order of read abundance (OT1-OT25). For each off-target site, aligned sequences, location of edit site on Hg38, gene, GUIDE-seq identified read counts and number of mismatches (MMs) to the on-target site are shown. For the 11 off-target sites are at LPA, LPA exon number and corresponding to KIV domain are shown. Due to highly homologous KIV domains, some of the OT sites (ex. OT4 and OT5; OT7 and OT8; OT9 and OT10; OT12, OT13 and OT18) have the same target and PAM sequences but occur at different genomic locations.

| Target | Aligned Sequence              | Edit Site       | Gene         | LPA exon (KIV domain)       | Distance from On (bp) | Reads | #MMs |
|--------|-------------------------------|-----------------|--------------|-----------------------------|-----------------------|-------|------|
| On     | .....TG.AG.                   | chr6+:160650419 | LPA          | exon2 (KIV <sub>1</sub> )   | 0                     | 630   | 0    |
| OT1    | AT.T.....TG.AGA               | chr6-:160905840 | LOC107986665 |                             | 255421                | 401   | 4    |
| OT2    | ...A..T.....TG.AG.            | chr6+:160599581 | LPA          | exon20 (KIV <sub>5</sub> )  | 50838                 | 377   | 2    |
| OT3    | A.....TG.AGG                  | chr6+:160577217 | LPA          | exon28 (KIV <sub>9</sub> )  | 73202                 | 363   | 1    |
| OT4    | A..T.....TA.AGA               | chr6+:160594039 | LPA          | exon22 (KIV <sub>6</sub> )  | 56380                 | 275   | 4    |
| OT5    | A..T.....TG.AGA               | chr6+:160477210 | LPAL2        |                             | 173209                | 224   | 3    |
| OT6    | A..T.....TG.AGA               | chr6+:160556106 | LPA          | exon30 (KIV <sub>10</sub> ) | 94313                 | 185   | 3    |
| OT7    | .....T.....TGAAG.             | chr6+:160500862 | LPAL2        |                             | 149557                | 108   | 2    |
| OT8    | .....T.....TGAAG.             | chr6+:160482741 | LPAL2        |                             | 167678                | 81    | 2    |
| OT9    | .....T.....A.....TG.AG.       | chr6+:160611643 | LPA          | exon16 (KIV <sub>3</sub> )  | 38776                 | 72    | 2    |
| OT10   | .....T.....A.....TG.AG.       | chr6+:160633834 | LPA          | exon8 (KIV <sub>2</sub> )   | 16585                 | 47    | 2    |
| OT11   | A..T.....A.....TG.AGA         | chr6+:160589634 | LPA          | exon24 (KIV <sub>7</sub> )  | 60785                 | 37    | 4    |
| OT12   | .....T.....TG.AG.             | chr6+:160617198 | LPA          | exon14 (KIV <sub>2</sub> )  | 33221                 | 15    | 1    |
| OT13   | .....T.....TG.AG.             | chr6+:160639381 | LPA          | exon6 (KIV <sub>2</sub> )   | 11039                 | 8     | 1    |
| OT14   | .....T.....TGAAA.             | chr6+:160491442 | LPAL2        |                             | 158977                | 4     | 2    |
| OT15   | .....T.....AATGAAG.           | chr6+:160605127 | LPA          | exon18 (KIV <sub>4</sub> )  | 45292                 | 4     | 4    |
| OT16   | ...A.....CA..G.....TA.AA.     | chr4+:131259328 | RNU6-224P    |                             |                       | 4     | 4    |
| OT17   | .G.A...C...ACA.....GG.AGC     | chr8+:62003251  | C1GALT1P3    |                             |                       | 3     | 7    |
| OT18   | .....T.....TG.AG.             | chr6+:160644928 | LPA          | exon4 (KIV <sub>2</sub> )   | 5491                  | 3     | 1    |
| OT19   | ....T.....A....A.....TT.AG.   | chr5+:45893210  | HCN1         |                             |                       | 3     | 3    |
| OT20   | ....C...C....AG.....T.GA.AAA  | chr5+:151448194 | SLC36A1      |                             |                       | 2     | 6    |
| OT21   | T.....G..A.....AATG.GAA       | chr16+:25134130 | LCMT1        |                             |                       | 2     | 6    |
| OT22   | CTGCT.....C.....GT.AAC        | chr10+:18249228 | CACNB2       |                             |                       | 1     | 7    |
| OT23   | ...A..GT.....TG..G....CA.AAA  | chr6+:20125534  | MBOAT1       |                             |                       | 1     | 7    |
| OT24   | .....G.A.....G..G.AGGAGAG     | chr17-:45243782 | FMNL1        |                             |                       | 1     | 6    |
| OT25   | ...T.C.....A....G...CA.GA.AGA | chrX+:110905812 | PAK3         |                             |                       | 1     | 7    |

**Table S2. Primers used for AAV titer quantification.**

| <b>Primer Name</b> | <b>Assay</b>         | <b>Primer Sequence</b>    |
|--------------------|----------------------|---------------------------|
| WRL_0066           | AAV titer SaCas9 Fw  | GTACTACGAGGAAACCGGGAAC    |
| WRL_0068           | AAV titer SaCas9 Rv  | GTTGTTGTAGAAGGAGGCGATAAAC |
| EYFP For2          | AAV titer Cre/GFP Fw | GCATCGACTTCAAGGAGGAC      |
| EGFP_Rev2          | AAV titer Cre/GFP Rv | TGCACGCTGCCGTCCTCGATG     |

**Table S3. List of primers used as well as corresponding figures and assays.**

| <b>Mouse</b>         |                           |                                 |                           |        |                      |
|----------------------|---------------------------|---------------------------------|---------------------------|--------|----------------------|
| <b>Primer name</b>   | <b>Figure</b>             | <b>Assay</b>                    | <b>Primer Sequence</b>    |        |                      |
| KI_R1                | FigS2                     | LPA transgene KI location       | CACCAACAACCTTCACGCTGG     |        |                      |
| KI_R2_nested         |                           |                                 | TCACTCCTCCTCTGCTCTCC      |        |                      |
| KI_F1                |                           |                                 | ACACTCAGAGCTTTGCAGCT      |        |                      |
| KI_F2_nested         |                           |                                 | CACTCTGTCTCACCAGGCTG      |        |                      |
| KIV1_F               | Fig3A, FigS6, FigS7       | ddPCR                           | TCACTGGCGGTTGATTGACA      |        |                      |
| KIV1_R               |                           |                                 | GCATTTGGGTAGTTTTCTGTGGT   |        |                      |
| KIV1_F2              | Fig3F, FigS8              | PCR and Sanger sequencing       | TCACTGGCGGTTGATTGACA      |        |                      |
| KIV5_del_R           |                           |                                 | CCTCTGTGCTTGATCTGGG       |        |                      |
| APOE_copy_F3         | FigS1, FigS7              | LPA transgene copy number ddPCR | GGAGAGCAGAGGAGGAGTGA      |        |                      |
| APOE_copy_R3         |                           |                                 | CCGACAGCTTCCAGACCTTT      |        |                      |
| Liver_copy_F4        |                           |                                 | CAACCCCTCAGTTCCCATCC      |        |                      |
| Liver_copy_R4        |                           |                                 | CCGAAATTCCAAGGGTCTGA      |        |                      |
| TFRC_new_F1          |                           |                                 | CTTCCCACCATGCTTGTTGC      |        |                      |
| TFRC_new_R1          |                           |                                 | CACTTCCGCTGCTGTACGAA      |        |                      |
| TFRC_new_F2          |                           |                                 | GCAGTGAGTTCTTCCCACCA      |        |                      |
| TFRC_new_R2          |                           |                                 | CGCTGCTGTACGAACCATTT      |        |                      |
| mRPP30_F1            |                           |                                 | CTACTGGCTTGGCTCTGTCC      |        |                      |
| mRPP30_R1            |                           |                                 | TAGGGACGTCAGGCAGATCA      |        |                      |
| mRPP30_F2            |                           |                                 | TCTGCAAGACGACCCAAGAC      |        |                      |
| mRPP30_F2            |                           |                                 | GGACAGAGCCAAGCCAGTAG      |        |                      |
| EYFP For2            |                           |                                 | Fig S5                    | AAV GC | GCATCGACTTCAAGGAGGAC |
| EGFP_Rev2            |                           |                                 |                           |        | TGCACGCTGCCGTCTCGATG |
| WRL_0066             | GTACTIONGAGGAAACCGGGAAC   |                                 |                           |        |                      |
| WRL_0068             | GTTGTTGTAGAAGGAGGCGATAAAC |                                 |                           |        |                      |
| <b>Human</b>         |                           |                                 |                           |        |                      |
| <b>Primer name</b>   | <b>Figure</b>             | <b>Assay</b>                    | <b>Primer Sequence</b>    |        |                      |
| LPA_F1               | Data not shown            | T7E1, ICE                       | CTCAGGACCCAGGGTGTTC       |        |                      |
| LPA_R1               |                           |                                 | CAGCTTGCAGTGCCAAATGT      |        |                      |
| LPA_long_F1          | Fig4A,C                   | on-target unarranged ddPCR      | CACGTCTGTCTGCCTGCTAA      |        |                      |
| LPA_long_R1          |                           |                                 | AGTTAGCTTGACGCACACCT      |        |                      |
| LPA_long_F2          |                           |                                 | TTTTTGCACGTCTGTCTGCC      |        |                      |
| LPA_long_R2          |                           |                                 | GCTTGACGCACACCTTTTCT      |        |                      |
| CACNA1C_F            |                           |                                 | GAGAGTGCCTGGTCTTTACTGCAGG |        |                      |
| CACNA1C_R            |                           |                                 | CTCTCCTATAGCTGCATGCACACCC |        |                      |
| LPA_CAST_bait_F1     | Fig5A,C                   | CAST-seq                        | TAGCAGCACCTGAGCAAAGC      |        |                      |
| LPA_CAST_bait_nest_F |                           |                                 | CACCTGAGCAAAGCCATGTG      |        |                      |
| LPA_decoy_R          |                           |                                 | ACGCATTTGGGTAGTTTTCTGTG   |        |                      |

|                     |       |                                          |                         |
|---------------------|-------|------------------------------------------|-------------------------|
| LPA_decoy_F         |       |                                          | ACAGTAAGCAAACAAGGTCCA   |
| ON_F2               | Fig5E | ON/OT<br>deletion<br>confirmation<br>PCR | TTTTTGACAGTCTGTCTGCC    |
| OT2_R1              |       |                                          | AGCCAAGTTGAGTCCTGAGC    |
| OT3_R2              |       |                                          | TCAAAAGCAAAGGTCCTGAGAC  |
| OT4_R               |       |                                          | TTCTAAGCACGTGGCCATGT    |
| OT6_R1              |       |                                          | AGCTCCATGTAGCCTTCTGC    |
| OT12_13_18_26_R2    |       |                                          | CGCCATCTGCATCTGTCACA    |
| OT1_F1              |       |                                          | AGTTAGCTTGACGCACACCT    |
| OT1_R1              |       |                                          | AAGCCTGAGACATTCTGCCC    |
| exon5_probe_MGB_FAM | Fig5F | KIV <sub>2</sub> CNV<br>ddPCR            | CTTGGCAGGTTCTTCC        |
| KIV2_copy_F         |       |                                          | GACAGAGTTATCGAGGCACATAC |
| KIV2_copy_R         |       |                                          | CTATGCGAGTGTGGTGTGCATAG |
| hRPP30_F            |       |                                          | GATTTGGACCTGCGAGCG      |
| hRPP30_R            |       |                                          | GCGGCTGTCTCCACAAGT      |
| hRPP30_probe_VIC    |       |                                          | CTGACCTGAAGGCTCT        |

## Supplemental References

1. Höijer I, Johansson J, Gudmundsson S, Chin CS, Bunikis I, Häggqvist S, Emmanouilidou A, Wilbe M, den Hoed M, Bondeson ML, et al. Amplification-free long-read sequencing reveals unforeseen CRISPR-Cas9 off-target activity. *Genome Biology*. 2020;21(1):1–19.
